# Supplementary material
Source: publisher site journal article supplement (https://www.e-cmh.org/upload/media/cmh-2023-0057-Supplementary-Table-1.pdf)
Supplement: Supplementary file 1 [file cmh-2023-0057-Supplementary-Table-1.pdf]

## Supplementary Tables

**Supplementary Table 1.** Ann Arbor classification

| Stage               | Features                                                                                                |
|---------------------|---------------------------------------------------------------------------------------------------------|
| I                   | Involvement of a single lymph node region or lymphoid structure (e.g., spleen, thymus, Waldeyer's ring) |
| II                  | Involvement of two or more lymph node regions on the same side of the diaphragm                         |
| III                 | Involvement of lymph regions or structures on both sides of the diaphragm                               |
| IV                  | Involvement of extranodal site(s) beyond that designated E over 6 months)                               |
| For all stages      |                                                                                                         |
| A                   | No symptoms                                                                                             |
| B                   | Fever ( $>38^{\circ}\text{C}$ ), drenching sweats, weight loss (10% body weight)                        |
| For stages I to III |                                                                                                         |
| E                   | Involvement of a single, extranodal site contiguous or proximal to known nodal site                     |
